# Supplementary material for: Load- and polysaccharide-dependent activation of the Na+-type MotPS stator in the Bacillus subtilis flagellar motor
Source: PubMed Central journal article supplement (PMC5380961; doi:10.1038/srep46081), 2017-04-05
Supplement: srep46081-s1.pdf [file srep46081-s1.pdf]

## **Supplementary information**

**Load- and polysaccharide-dependent activation of the Na<sup>+</sup>-  
type MotPS stator in the *Bacillus subtilis* flagellar motor**

**Naoya Terahara, Yukina Noguchi, Shuichi Nakamura, Nobunori**

**Kami-ike, Masahiro Ito, Keiichi Namba and Tohru Minamino**

**Table S1. Rotational speed and torque of the MotAB motor.**

| Bead size ( $\mu\text{m}$ ) |                | 2.0             | 1.5             | 1.0             | 0.8             | 0.6           | 0.5          |
|-----------------------------|----------------|-----------------|-----------------|-----------------|-----------------|---------------|--------------|
| NaCl                        | Speed (Hz)     | $10 \pm 2$      | $13 \pm 2$      | $47 \pm 6$      | $107 \pm 15$    | $155 \pm 20$  | $175 \pm 33$ |
|                             | Torque (pN nm) | $2,131 \pm 278$ | $2,081 \pm 174$ | $2,021 \pm 205$ | $1,879 \pm 194$ | $881 \pm 182$ | $535 \pm 99$ |
| KCl                         | Speed (Hz)     | $8 \pm 3$       | $14 \pm 3$      | $56 \pm 7$      | $104 \pm 12$    | $166 \pm 32$  | $180 \pm 36$ |
|                             | Torque (pN nm) | $2,172 \pm 337$ | $2,244 \pm 293$ | $2,020 \pm 315$ | $1,801 \pm 249$ | $781 \pm 112$ | $485 \pm 94$ |

**Table S2. Rotational speed and torque of the MotPS motor.**

|             | Bead size ( $\mu\text{m}$ ) | 1.5           | 1.0           | 0.8          | 0.6          | 0.5          |
|-------------|-----------------------------|---------------|---------------|--------------|--------------|--------------|
| $P_{motAB}$ | Speed (Hz)                  | $1.4 \pm 0.1$ | $6 \pm 1$     | $11 \pm 2$   | $25 \pm 5$   | $33 \pm 8$   |
|             | Torque (pN nm)              | $220 \pm 38$  | $206 \pm 35$  | $191 \pm 27$ | $187 \pm 39$ | $118 \pm 23$ |
| $P_{grac}$  | Speed (Hz)                  | $5 \pm 1$     | $19 \pm 4$    | $31 \pm 4$   | $37 \pm 3$   | $40 \pm 4$   |
|             | Torque (pN nm)              | $900 \pm 236$ | $790 \pm 127$ | $502 \pm 54$ | $313 \pm 25$ | $190 \pm 16$ |

**Table S3. Rotational speed and torque of the MotPS motor measured using a 1.0- $\mu\text{m}$  bead in media containing 0%, 2%, 4%, 6%, 8% and 10% Ficoll 400 (w/v).**

|                             |              |              |               |               |               |                 |
|-----------------------------|--------------|--------------|---------------|---------------|---------------|-----------------|
| Bead size ( $\mu\text{m}$ ) | 1.0          | 1.0          | 1.0           | 1.0           | 1.0           | 1.0             |
| Ficoll (%)                  | 0            | 2            | 4             | 6             | 8             | 10              |
| Speed (Hz)                  | $6 \pm 1$    | $7 \pm 2$    | $7 \pm 2$     | $6 \pm 1$     | $6 \pm 1$     | $5 \pm 1$       |
| Torque (pN nm)              | $209 \pm 35$ | $331 \pm 62$ | $472 \pm 124$ | $645 \pm 156$ | $838 \pm 185$ | $1,150 \pm 238$ |

**Table S4. Rotational speed and torque of the MotPS motor in media containing 10% Ficoll 400 (w/v).**

|                             |                 |                 |               |               |               |
|-----------------------------|-----------------|-----------------|---------------|---------------|---------------|
| Bead size ( $\mu\text{m}$ ) | 1.5             | 1.0             | 0.8           | 0.6           | 0.5           |
| Ficoll (%)                  | 10              | 10              | 10            | 10            | 10            |
| Speed (Hz)                  | $4 \pm 2$       | $6 \pm 1$       | $11 \pm 3$    | $24 \pm 4$    | $31 \pm 6$    |
| Torque (pN nm)              | $1,717 \pm 279$ | $1,261 \pm 238$ | $995 \pm 248$ | $704 \pm 118$ | $563 \pm 102$ |

**Table S5. Rotational speed and torque of the PS-L, PS-p2, and PS-p3 motors.**

|       | Bead size ( $\mu\text{m}$ ) | 1.5             | 1.0           | 0.8          | 0.6          | 0.5          |
|-------|-----------------------------|-----------------|---------------|--------------|--------------|--------------|
| PS-L  | Speed (Hz)                  | $1.0 \pm 0.6$   | $6 \pm 1$     | $12 \pm 2$   | $26 \pm 5$   | $34 \pm 7$   |
|       | Torque (pN nm)              | $209 \pm 71$    | $217 \pm 99$  | $215 \pm 70$ | $203 \pm 40$ | $130 \pm 20$ |
| PS-p2 | Speed (Hz)                  | $5 \pm 1$       | $19 \pm 5$    | $28 \pm 4$   | $35 \pm 6$   | $42 \pm 6$   |
|       | Torque (pN nm)              | $793 \pm 221$   | $652 \pm 191$ | $478 \pm 64$ | $289 \pm 50$ | $159 \pm 19$ |
| PS-p3 | Speed (Hz)                  | $7 \pm 2$       | $25 \pm 2$    | $35 \pm 6$   | $41 \pm 6$   | $45 \pm 6$   |
|       | Torque (pN nm)              | $1,106 \pm 127$ | $860 \pm 212$ | $603 \pm 87$ | $359 \pm 48$ | $189 \pm 22$ |

**Table S6. Rotational speed and torque of the AB-p3 motor.**

| Bead size ( $\mu\text{m}$ ) |                | 2.0             | 1.5             | 1.0             | 0.8             | 0.6           | 0.5           |
|-----------------------------|----------------|-----------------|-----------------|-----------------|-----------------|---------------|---------------|
| NaCl                        | Speed (Hz)     | $10 \pm 1$      | $20 \pm 2$      | $40 \pm 8$      | $92 \pm 19$     | $149 \pm 27$  | $169 \pm 31$  |
|                             | Torque (pN nm) | $2,097 \pm 396$ | $2,271 \pm 302$ | $1,981 \pm 281$ | $1,895 \pm 228$ | $841 \pm 142$ | $585 \pm 104$ |
| KCl                         | Speed (Hz)     | $8 \pm 1$       | $16 \pm 4$      | $32 \pm 8$      | $71 \pm 14$     | $123 \pm 22$  | $151 \pm 36$  |
|                             | Torque (pN nm) | $1,586 \pm 373$ | $1,599 \pm 306$ | $1,442 \pm 285$ | $1,414 \pm 226$ | $725 \pm 134$ | $500 \pm 119$ |

**Table S7. Bacterial strains used in this study.**

| Strain                               | Relevant characteristics                                                                                                                                                             | Source or reference |
|--------------------------------------|--------------------------------------------------------------------------------------------------------------------------------------------------------------------------------------|---------------------|
| <i>Escherichia coli</i>              |                                                                                                                                                                                      |                     |
| DH5 $\alpha$ MCR                     | F <sup>-</sup> <i>mcrA</i> $\Delta$ 1 ( <i>mrr-hsd RMS-mcrBC</i> ) $\Phi$ 80 <i>dlacZ</i> $\Delta$ ( <i>lacZYAargF</i> )<br><i>U169 deoR recA1 endA1 supE44 lthi-1 gyr-496 relA1</i> | Stratagene          |
| <i>Salmonella</i>                    |                                                                                                                                                                                      |                     |
| SJW46                                | <i>fliC</i> ( $\Delta$ 205-293)                                                                                                                                                      | 1                   |
| <i>Bacillus subtilis</i>             |                                                                                                                                                                                      |                     |
| BR151MA                              | <i>lys3 trpC2</i> (wild type)                                                                                                                                                        | 2                   |
| $\Delta$ hag                         | <i>lys3 trpC2</i> $\Delta$ hag:: <i>spec</i>                                                                                                                                         | This study          |
| WT-sticky                            | <i>lys3 trpC2</i> $\Delta$ hag:: <i>spec amyE::P<sub>hag</sub>-hagsticky</i>                                                                                                         | This study          |
| $\Delta$ AB                          | <i>lys3 trpC2</i> $\Delta$ motAB:: <i>ery</i>                                                                                                                                        | 3                   |
| $\Delta$ PS                          | <i>lys3 trpC2</i> $\Delta$ motPS:: <i>neo</i>                                                                                                                                        | 3                   |
| $\Delta$ AB $\Delta$ PS              | <i>lys3 trpC2</i> $\Delta$ motAB:: <i>ery</i> $\Delta$ motPS:: <i>neo</i>                                                                                                            | 3                   |
| AB                                   | $\Delta$ motAB $\Delta$ motPS <i>amyE::P<sub>motAB</sub>-motAB</i>                                                                                                                   | 3                   |
| PS                                   | $\Delta$ motAB $\Delta$ motPS <i>amyE::P<sub>motAB</sub>-motPS</i>                                                                                                                   | 3                   |
| AB-His <sub>6</sub>                  | $\Delta$ motAB $\Delta$ motPS <i>amyE::P<sub>motAB</sub>-motAB-his<sub>6</sub></i>                                                                                                   | This study          |
| PS-His <sub>6</sub>                  | $\Delta$ motAB $\Delta$ motPS <i>amyE::P<sub>motAB</sub>-motPS-his<sub>6</sub></i>                                                                                                   | This study          |
| P <sub>grac</sub> -AB                | $\Delta$ motAB $\Delta$ motPS <i>amyE::P<sub>grac</sub>-motAB</i>                                                                                                                    | This study          |
| P <sub>grac</sub> -PS                | $\Delta$ motAB $\Delta$ motPS <i>amyE::P<sub>grac</sub>-motPS</i>                                                                                                                    | This study          |
| $\Delta$ AB $\Delta$ PS $\Delta$ Hag | $\Delta$ motAB $\Delta$ motPS $\Delta$ hag:: <i>spec</i>                                                                                                                             | This study          |
| AB-sticky                            | $\Delta$ motAB $\Delta$ motPS $\Delta$ hag:: <i>spec amyE::P<sub>motAB</sub>-motAB, P<sub>hag</sub>-hagsticky</i>                                                                    | This study          |
| PS-sticky                            | $\Delta$ motAB $\Delta$ motPS $\Delta$ hag:: <i>spec amyE::P<sub>motAB</sub>-motPS, P<sub>hag</sub>-hagsticky</i>                                                                    | This study          |
| P <sub>grac</sub> -AB-sticky         | $\Delta$ motAB $\Delta$ motPS $\Delta$ hag:: <i>spec amyE::P<sub>grac</sub>-motAB, P<sub>hag</sub>-hagsticky</i>                                                                     | This study          |
| P <sub>grac</sub> -PS-sticky         | $\Delta$ motAB $\Delta$ motPS $\Delta$ hag:: <i>spec amyE::P<sub>grac</sub>-motPS, P<sub>hag</sub>-hagsticky</i>                                                                     | This study          |
| AB-p3-sticky                         | $\Delta$ motAB $\Delta$ motPS $\Delta$ hag:: <i>spec amyE::P<sub>motAB</sub>-motAB-p3, P<sub>hag</sub>-hagsticky</i>                                                                 | This study          |
| PS-L-sticky                          | $\Delta$ motAB $\Delta$ motPS $\Delta$ hag:: <i>spec amyE::P<sub>motAB</sub>-motPS-L, P<sub>hag</sub>-hagsticky</i>                                                                  | This study          |
| PS-p1-sticky                         | $\Delta$ motAB $\Delta$ motPS $\Delta$ hag:: <i>spec amyE::P<sub>motAB</sub>-motPS-p1, P<sub>hag</sub>-hagsticky</i>                                                                 | This study          |
| PS-p2-sticky                         | $\Delta$ motAB $\Delta$ motPS $\Delta$ hag:: <i>spec amyE::P<sub>motAB</sub>-motPS-p2, P<sub>hag</sub>-hagsticky</i>                                                                 | This study          |
| PS-p3-sticky                         | $\Delta$ motAB $\Delta$ motPS $\Delta$ hag:: <i>spec amyE::P<sub>motAB</sub>-motPS-p3, P<sub>hag</sub>-hagsticky</i>                                                                 | This study          |

**References**

1. Yoshioka, K., Aizawa, S.-I. & Yamaguchi, S. Flagellar filament structure and cell motility of *Salmonella typhimurium* mutants lacking part of the outer domain of flagellin. *J. Bacteriol.* **177**, 1090-1093 (1995).
2. Grundy, F.J., Turinsky, A.J. & Henkin, T.M. Catabolite regulation of *Bacillus subtilis* acetate and acetoin utilization genes by *CcpA*. *J. Bacteriol.* **176**, 4527-4533 (1994).
3. Ito, M., Terahara, N., Fujinami, S. & Krulwich, T.A. Properties of motility in *Bacillus subtilis* powered by the H<sup>+</sup>-coupled MotAB flagellar stator, Na<sup>+</sup>-coupled MotPS or hybrid stators MotAS or MotPB. *J. Mol. Biol.* **352**, 396–408 (2005).



**Table S8. Plasmids used in this study.**

| Plasmid                          | Relevant characteristics                                                                                                           | Source or reference |
|----------------------------------|------------------------------------------------------------------------------------------------------------------------------------|---------------------|
| pDG1730                          | <i>amyE</i> integration vector with <i>Spec<sup>r</sup></i> gene                                                                   | 1                   |
| pDR67                            | <i>amyE</i> integration vector with <i>Cm<sup>r</sup></i> gene and P <sub>spac</sub><br>promoter upstream of multiple cloning site | 2                   |
| pHT01                            | <i>B. subtilis</i> expression vector by P <sub>grac</sub> promoter                                                                 | MoBiTec             |
| pDR-AB                           | pDR67 + P <sub>motAB</sub> - <i>motAB</i> from BR151MA                                                                             | 3                   |
| pDR-PS                           | pDR67 + P <sub>motAB</sub> - <i>motPS</i> from BR151MA                                                                             | 3                   |
| pDR-AB-His <sub>6</sub>          | pDR67 + P <sub>motAB</sub> - <i>motAB-his<sub>6</sub></i>                                                                          | This study          |
| pDR-PS-His <sub>6</sub>          | pDR67 + P <sub>motAB</sub> - <i>motPS-his<sub>6</sub></i>                                                                          | This study          |
| pHT-AB                           | pHT01 + P <sub>grac</sub> - <i>motAB</i>                                                                                           | This study          |
| pHT-PS                           | pHT01 + P <sub>grac</sub> - <i>motPS</i>                                                                                           | This study          |
| pDR-P <sub>grac</sub> -AB        | pDR67 + P <sub>grac</sub> - <i>motAB</i>                                                                                           | This study          |
| pDR-P <sub>grac</sub> -PS        | pDR67 + P <sub>grac</sub> - <i>motPS</i>                                                                                           | This study          |
| pDR-hagsticky                    | pDR67 + P <sub>hag</sub> - <i>hagsticky</i> from BR151MA and SJW46                                                                 | This study          |
| pDR-ABsticky                     | pDR-hagsticky + P <sub>motAB</sub> - <i>motAB</i>                                                                                  | This study          |
| pDR-PSsticky                     | pDR-hagsticky + P <sub>motAB</sub> - <i>motPS</i>                                                                                  | This study          |
| pDR- P <sub>grac</sub> -ABsticky | pDR-hagsticky + P <sub>grac</sub> - <i>motAB</i>                                                                                   | This study          |
| pDR- P <sub>grac</sub> -PSsticky | pDR-hagsticky + P <sub>grac</sub> - <i>motPS</i>                                                                                   | This study          |
| pDR-ABp3sticky                   | pDR-hagsticky + P <sub>motAB</sub> - <i>motAB-p3</i>                                                                               | This study          |
| pDR-PSLsticky                    | pDR-hagsticky + P <sub>motAB</sub> - <i>motPS-L</i>                                                                                | This study          |
| pDR-PSp1sticky                   | pDR-hagsticky + P <sub>motAB</sub> - <i>motPS-p1</i>                                                                               | This study          |
| pDR-PSp2sticky                   | pDR-hagsticky + P <sub>motAB</sub> - <i>motPS-p2</i>                                                                               | This study          |
| pDR-PSp3sticky                   | pDR-hagsticky + P <sub>motAB</sub> - <i>motPS-p3</i>                                                                               | This study          |

**References**

1. Guérout-Fleury, A.M., Frandsen, N. & Stragier, P. Plasmids for ectopic integration in *Bacillus subtilis*. *Gene* **180**, 57-61 (1996).
2. Ireton, K., Rudner, D.Z., Siranosian, K.J. & Grossman, A.D. Integration of multiple developmental signals in *Bacillus subtilis* through the Spo0A transcription factor. *Genes & Dev.* **7**, 283-294 (1993).
3. Ito, M., Terahara, N., Fujinami, S. & Krulwich, T.A. Properties of motility in *Bacillus subtilis* powered by the H<sup>+</sup>-coupled MotAB flagellar stator, Na<sup>+</sup>-coupled MotPS or hybrid stators MotAS or MotPB. *J. Mol. Biol.* **352**, 396–408 (2005).
